# Supplementary material for: Facile fabrication of wafer-scale, micro-spacing and high-aspect-ratio silicon microwire arrays
Source: Royal Society of Chemistry journal article supplement (doi:10.1039/c6ra19104e), 2016-01-01
Supplement: c6ra19104e1.pdf [file c6ra19104e1.pdf]

*Electronic Supplementary Information for*

## **Facile fabrication of wafer-scale, micro-spacing and high-aspect-ratio silicon microwire arrays**

**Jimu Yan<sup>†a,b</sup>, Shaolong Wu<sup>†\*a,b</sup>, Xiongfei Zhai<sup>a,b</sup>, Xiang Gao<sup>a,b</sup>, Xiaofeng Li<sup>\*a,b</sup>**

<sup>a</sup>College of Physics, Optoelectronics and Energy & Collaborative Innovation Center of Suzhou Nano Science and Technology, Soochow University, Suzhou 215006, China;

<sup>b</sup>Key Lab of Advanced Optical Manufacturing Technologies of Jiangsu Province & Key Lab of Modern Optical Technologies of Education Ministry of China, Soochow University, Suzhou 215006, China.

\*E-mail: shaolong\_wu@suda.edu.cn; xfli@suda.edu.cn

†These two authors contributed equally to this work

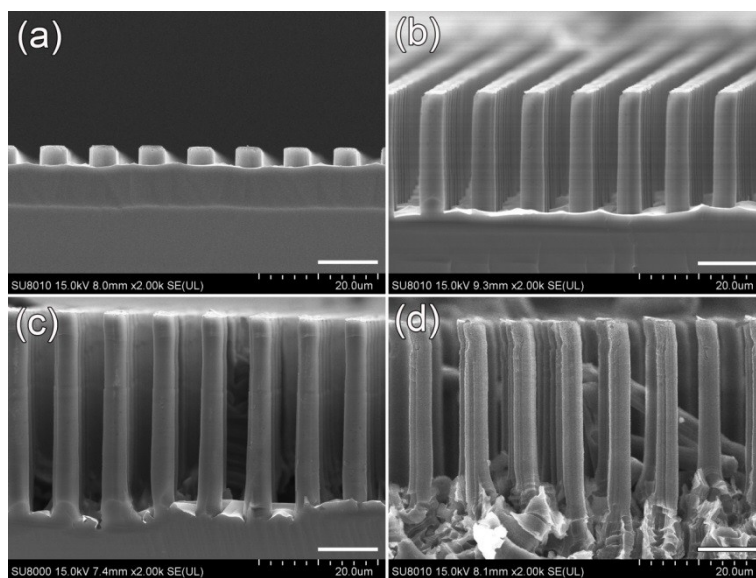

**Fig. S1.** Typical cross-sectional SEM images of the as-etched Si produced with the catalyst of 30/3 nm Au/Ti film. The etching durations of (a–d) are 1, 4, 8 and 10 h, respectively. The etching temperature is 30 °C. The H<sub>2</sub>O<sub>2</sub> (HF) concentration is 0.2 (8.0) mol/L. Scale bar is 10 μm in all figures.

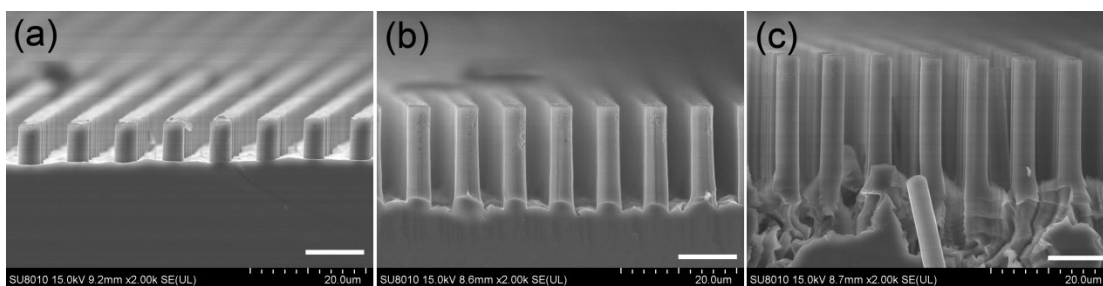

**Fig. S2.** Typical cross-sectional SEM images of the as-etched Si produced with the catalyst of 30/3 nm Au/Ti film. The  $\text{H}_2\text{O}_2$  concentrations of (a-c) are 0.2, 0.4 and 0.6 mol/L, respectively. The etching temperature is 30 °C. The HF concentration is 8 mol/L. The etching duration is 2 h. Scale bar is 10  $\mu\text{m}$  in all figures.

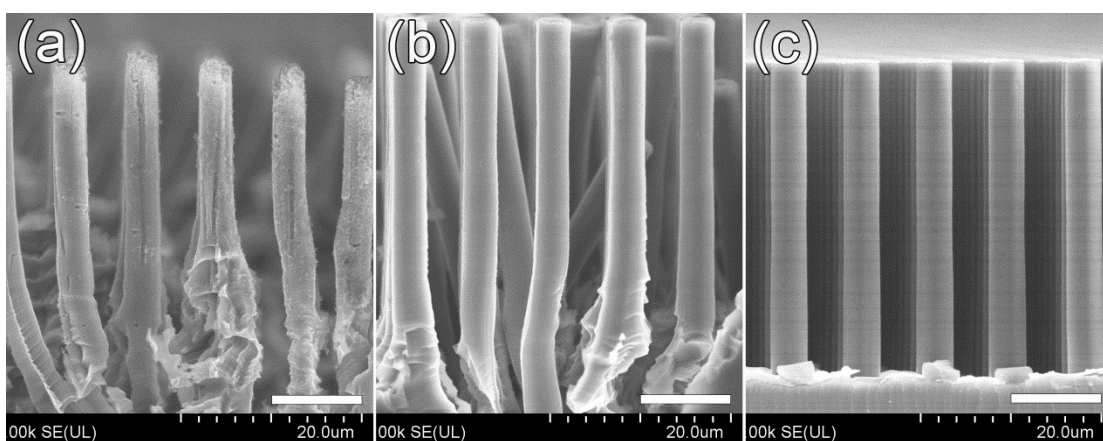

**Fig. S3.** Typical cross-sectional SEM images of the as-etched Si produced under different etching temperatures (50 °C, 30 °C and 8 °C). The metal catalyst is 40/5 nm Au/Ti. The etching duration is 12 h.  $\text{H}_2\text{O}_2$  (HF) concentration is 0.2 (8.0) mol/L. Scale bar is 10  $\mu\text{m}$  in all figures.

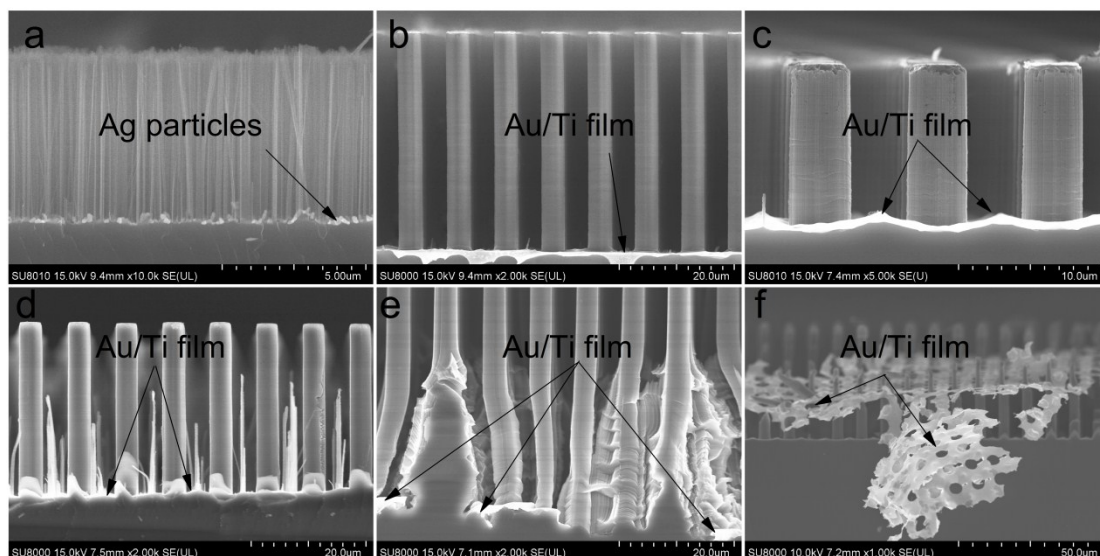

**Fig. S4.** Typical morphologies of the as-etched Si with residual metal catalyst corresponding to Models 1–6. The etching time of (a–f) is 20 min, 22 h, 4 h, 18 h, 24 h and 12 h, respectively. The  $\text{H}_2\text{O}_2$  concentration of (a–e) and (f) is 0.2 mol/L and 0.8 mol/L, respectively. The HF concentration of (a) and (b–f) is 5.0 mol/L and 8.0 mol/L, respectively. The metal catalysts of (a), (b, e, f) and (c, d) are Ag particles obtained by electroless chemical deposition, 40/5 nm Au/Ti films and 30/5 nm Au/Ti films, respectively. The etching temperature of (a), (c) and (b, d, e, f) is 15 °C, 30 °C and 8 °C, respectively.
